# 1 Phenotype-Centric Modeling for Rational Metabolic Engineering

2 Miguel Á. Valderrama-Gómez<sup>1\*</sup>, Michael A. Savageau<sup>1,2</sup>.

3

4 <sup>1</sup> Department of Microbiology and Molecular Genetics, University of California, Davis.  
5 One Shields Avenue, Davis, CA 95616 USA.

6

7 <sup>2</sup> Department of Biomedical Engineering, University of California, Davis. One Shields  
8 Avenue, Davis, CA 95616 USA.

9

10

11 \* Corresponding Author: [mavalderramagomez@ucdavis.edu](mailto:mavalderramagomez@ucdavis.edu)

12

13 **Keywords:** Mechanistic Modeling, Kinetic Models, Metabolic Models, Linear  
14 Programming, Mevalonate Pathway, System Design Space.

15

16

17

18

19 **Abstract**

20

21

22 Phenotype-centric modeling enables a paradigm shift in the analysis of kinetic models. It  
23 brings the focus to a network's biochemical phenotypes and their relationship with  
24 measurable traits (e.g., product yields, system dynamics, signal amplification factors, etc.)  
25 and away from computationally intensive parameter sampling and numerical simulation.  
26 Here, we explore applications of this new modeling strategy in the field of Rational  
27 Metabolic Engineering using the amorphaadiene biosynthetic network as a case study. Our  
28 phenotype-centric approach not only identifies known beneficial intervention strategies  
29 for this network, but it also provides an understanding of mechanistic context for the  
30 validity of these predictions. Additionally, we propose a set of hypothetical strains with the  
31 potential to outperform reported production strains and enhance the mechanistic  
32 understanding of the amorphaadiene biosynthetic network. We believe that phenotype-  
33 centric modeling can advance the field of Rational Metabolic Engineering by enabling the  
34 development of next generation kinetics-based algorithms and methods that do not rely  
35 on *a priori* knowledge of kinetic parameters but allow a structured, global analysis of the  
36 design space of parameter values.

37

38

39

## 40 **1. Introduction**

41

42 Metabolic Engineering aims at developing cellular factories to produce valuable  
43 chemicals by altering the metabolism of microbial strains through genetic engineering  
44 (Bailey, 1991; Lee et al., 2012; Chubukov et al., 2016). During the last decades,  
45 computational methods have enabled the discovery of non-intuitive strategies  
46 enhancing the production of a variety of target molecules (Nakamura and Whited, 2003;  
47 Lee et al., 2005; Yim et al., 2011; Paddon et al., 2013; Harder et al., 2016), giving rise to  
48 a model-based Metabolic Engineering that is increasingly less dependent on  
49 experimental intuition. Existing mathematical frameworks for rational Metabolic  
50 Engineering typically fall within one of two categories: kinetics- (mechanistic) or  
51 constraint-based methods (Valderrama-Gómez et al., 2017). The former is the gold  
52 standard and has the potential to capture intricate interactions between different levels  
53 of cellular organization (transcription, translation, and metabolism), which need to be  
54 rigorously integrated to understand and successfully optimize biological systems.  
55 Mechanistic models are truly predictive because they provide a rigorous link between  
56 metabolite concentrations, enzyme availability, and intracellular flux distributions.  
57 However, the application of mechanistic modeling in Metabolic Engineering has been  
58 rather limited, mainly due to a bottleneck caused by the large number of associated  
59 parameters with unknown values (Chowdhury, 2015), and structural uncertainties  
60 arising from unknown molecular interactions (Link et al., 2014). Consequently,  
61 constraint-based modeling (e.g., flux balance analysis) has been the method of choice  
62 to rationally guide the development of production strains (Zomorodi, 2012; Valderrama-

63 Gómez et al., 2017), which is reflected in most strain design algorithms being based on  
64 stoichiometric descriptions of cellular metabolism (Valderrama-Gómez et al., 2017).

65 Even though constraint-based modeling has proven to be useful in characterizing  
66 certain aspects of metabolic networks (e.g., maximal theoretical yields), important  
67 features such as network dynamics and metabolite concentrations are outside the  
68 scope of these models (Wiechert and Noack, 2011). Thus, implementing engineering  
69 strategies suggested by constraint-based metabolic models can potentially lead to non-  
70 viable strains because critical aspects of the metabolic system, such as dynamical  
71 instability and concentrations of potentially toxic metabolite intermediates are not  
72 considered.

73 Overcoming the limitations of kinetic modeling will require a radical change in  
74 how these models are formulated and analyzed. In the last decade, ensemble modeling  
75 of metabolic networks has emerged as a useful approach to address both parametric  
76 (Tran et al., 2008; Lee et al., 2014) and structural (Link et al., 2014) uncertainties in  
77 kinetic models. Instead of analyzing a single model, this approach considers thousands  
78 of models, each exhibiting a different set of parameter values or alternative molecular  
79 interactions. A recently developed *phenotype-centric* modeling strategy (Lomnitz and  
80 Savageau, 2016; Valderrama-Gómez et al., 2018) offers enormous potential for the field  
81 of rational Metabolic Engineering by allowing the analysis of mechanistic models without  
82 *a priori* knowledge of kinetic parameters (Valderrama-Gómez, et al., 2020). The strategy  
83 combines a model decomposition technique with linear programming in logarithmic  
84 space to identify a space-filling set of *biochemical phenotypes*, each one valid within a  
85 high-dimensional polytope in the design space of parameter values. Biochemical

86 phenotypes are mathematically described by a simplified set of S-system differential  
87 equations (i.e., sub-systems), and an accompanying set of linear inequalities in  
88 logarithmic space. The mathematical object defining a biochemical phenotype involves  
89 all the system variables, parameters, and non-dominant processes. This is critically  
90 important because the ‘dominance concept’ may erroneously suggest a model reduction  
91 method with significant losses. It follows that any point in the parameter space is  
92 contained within at least one such biochemical phenotype. Powerful mathematical  
93 techniques have been developed to characterize S-systems in terms of steady states,  
94 signal amplification factors (logarithmic gains), phenotypic volumes, and dynamic  
95 behavior (Savageau et al., 2009; Fasani and Savageau, 2010; Lomnitz and Savageau,  
96 2016). These features link experimentally observable biological phenotypes with  
97 specific regions in the parameter space to produce a finite, chunked and highly  
98 structured System Design Space.

99         In a recent work, we briefly discussed the potential of the phenotype-centric  
100 approach in Metabolic Engineering by analyzing the protocatechuate metabolic system  
101 of *Acinetobacter* (Valderrama-Gómez et al., 2020). We built a mathematical model  
102 considering the transport of protocatechuate into the cell and its subsequent enzymatic  
103 degradation, the synthesis of the intervening enzymes and, a signaling layer controlling  
104 the synthesis of mRNA molecules. The mathematical model encompassed 30  
105 parameters whose values were assumed to be unknown. Using the phenotype-centric  
106 approach, we were able to identify a biochemical phenotype and values for all system  
107 parameters that potentially correspond to the natural operating point of the system.

108 Moreover, we proposed several engineering strategies to increase the pathway flux  
109 without increasing the intracellular concentration of toxic pathway intermediates.

110 In this work, we will further explore the utility of the phenotype-centric strategy in  
111 the field of Metabolic Engineering. We will use the amorphaadiene biosynthetic network  
112 shown in Fig. 1 as a case study. Weaver et. al. (2015) mechanistically characterized  
113 this metabolic system in *Escherichia coli* using a kinetic model to identify various  
114 engineering strategies to increase productivity. *In silico* predictions were experimentally  
115 implemented and the performance of the resulting engineered strains closely matched  
116 model predictions. The work by Weaver et. al. (2015) will help us contrast traditional  
117 strain optimization procedures using kinetic models in a simulation-centric approach  
118 with our novel phenotype-centric strategy. As we will show later, our analysis not only  
119 reproduces the predictions made by Weaver et. al. (2015) but also provides a structured  
120 context in the System Design Space for which those predictions are valid. Furthermore,  
121 engineering strategies covering different regions in Design Space are also identified by  
122 our approach in a computationally efficient way that does not involve parameter  
123 sampling or numerical solution of the underlying kinetic model.

124 We start in Section 2 by providing a description of the amorphaadiene biosynthetic  
125 pathway and briefly summarizing previous findings by Weaver et. al. (2015). Relevant  
126 features of the phenotype-centric approach will be presented in Section 3. For a more  
127 detailed review of the method's mathematical background along with its computational  
128 implementation, the interested reader is directed to previous publications (Savageau et  
129 al., 2009; Fasani and Savageau, 2010; Lomnitz and Savageau, 2016; Valderrama-  
130 Gómez et al., 2018; Valderrama-Gómez et al., 2020). Section 4 will illustrate different

131 applications of the phenotype-centric strategy in Metabolic Engineering. Lastly, we  
132 conclude with a discussion and provide future directions in Section 5.

133

## 134 **2. The Amorphadiene Biosynthetic Pathway**

135

136 Amorphadiene is a volatile terpene involved in the synthesis of the anti-malarial drug  
137 artemisinin and its heterologous production was first reported in *E. coli* (Newman et al.,  
138 2006). Weaver et. al. (2015) mechanistically characterized a metabolic system which  
139 used externally provided mevalonate to synthesize amorphadiene in a series of seven  
140 enzyme-catalyzed steps. The authors employed a kinetic model to identify the  
141 concentration of amorphadiene synthase (ADS), the last enzyme of the pathway (Fig.  
142 1), as one of the main engineering targets to improve productivity. The analysis of the  
143 kinetic model also showed that alleviating the feedback inhibition of mevalonate kinase  
144 (the first enzyme in the pathway) by farnesyl pyrophosphate (the final pathway  
145 intermediate) did not increase amorphadiene productivity, as previously hypothesized  
146 (Weaver et. al., 2015). Both predictions were based on a sensitivity analysis of the  
147 model parameters and were experimentally verified by constructing and characterizing  
148 three different strains: mbis3 (the base strain), saMK, and 10kADS. The kinetic model  
149 developed by Weaver et al. (2015) was based on a considerable body of previous  
150 experimental work that involved extracting values for 26 kinetic parameters from the  
151 literature and experimentally determining protein concentrations for all three strains.  
152 We slightly modified this model to consider a first-order output flux for amorphadiene  
153 (Eqs. S1 to S8). This modification does not affect the dynamics of the network's

154 metabolic pools and solely serves to conveniently characterize the flux through the  
155 pathway in the context of the phenotype-centric approach.  
156

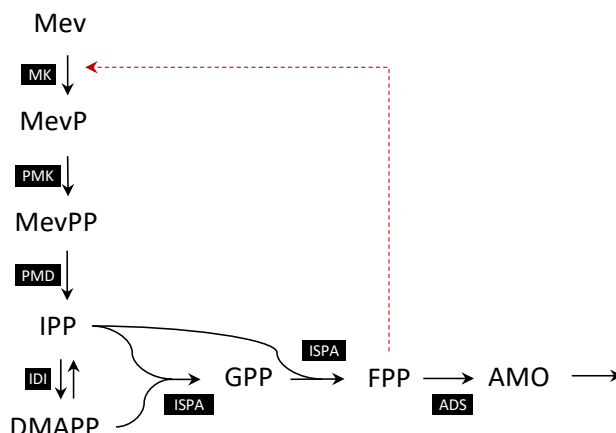

157  
158  
159 **Figure 1. The Amorphadiene Biosynthetic Pathway.** Amorphadiene is synthesized  
160 from externally supplied mevalonate in a series of seven enzyme-catalyzed reactions that  
161 involve the interaction of eight different metabolites. Enzymes are represented by black  
162 boxes using the following abbreviations: *MK*: Mevalonate kinase, *PMK*:  
163 Phosphomevalonate kinase, *PMD*: Mevalonate diphosphate decarboxylase, *IDI*:  
164 Isopentenyl-diphosphate isomerase, *ISPA*: Farnesyl pyrophosphate synthase, *ADS*:  
165 Amorphadiene synthase. Metabolites are represented by the following abbreviations:  
166 *Mev*: Mevalonate, *MevP*: Mevalonate phosphate, *MevPP*: Mevalonate pyrophosphate,  
167 *IPP*: Isopentenyl pyrophosphate, *DMAPP*: Dimethylallyl pyrophosphate, *GPP*: geranyl  
168 diphosphate, *FPP*: farnesyl diphosphate, *AMO*: Amorphadiene. The isomerization  
169 reaction of IPP and DMAPP catalyzed by IDI is the only reversible reaction in the network.  
170 The pathway involves feedback inhibition of MK, the first enzyme, by the last metabolic  
171 intermediate, FPP.

172  
173  
174  
175  
176

### 3. Materials and Methods

177  
178 The System Design Space (Savageau et al., 2009) represents the mathematical  
179 foundation upon which the phenotype-centric modeling strategy (Valderrama-Gómez et  
180 al. 2018) is built. Here, we will provide a brief overview of key concepts as well as

181 instructions to access computational tools to reproduce the results presented in this  
182 work.

183

### 184 3.1 System Design Space: Key Concepts

185

186 Biochemical systems described by the power-law functions of chemical kinetics and the  
187 rational functions of biochemical kinetics can be represented in a Generalized Mass  
188 Action (GMA) form (Savageau and Voit, 1987):

189

$$190 \quad \frac{dX_i}{dt} = \sum_{k=1}^{P_i} \alpha_{ik} \prod_{j=1}^{n+m} X_j^{g_{ijk}} - \sum_{k=1}^{Q_i} \beta_{ik} \prod_{j=1}^{n+m} X_j^{h_{ijk}} \quad i = 1, \dots, n_c \quad (1)$$

$$191 \quad 0 = \sum_{k=1}^{P_i} \alpha_{ik} \prod_{j=1}^{n+m} X_j^{g_{ijk}} - \sum_{k=1}^{Q_i} \beta_{ik} \prod_{j=1}^{n+m} X_j^{h_{ijk}} \quad i = (n_c + 1), \dots, n \quad (2)$$

192

193 Where  $\alpha_{ik}$  and  $\beta_{ik}$  represent rate constants, while  $g_{ijk}$  and  $h_{ijk}$  are kinetic orders.  $P_i$  and  
194  $Q_i$  are the number of positive and negative terms in the  $i$ -th equation, respectively.

195 Additionally,  $X_i$  represents the concentration of a chemical species in a system

196 containing a total of  $n$  dependent and  $m$  independent variables. The set  $n_c$  of chemical

197 variables represents all the chemical/biological entities (e.g., enzymes, metabolites,

198 mRNA molecules, etc.) of the system. On the other hand, the set  $n - n_c$  contains

199 auxiliary variables generated when recasting the system of ordinary differential

200 equations into its GMA form. Environmental input variables for which a differential

201 equation or algebraic constraint are not defined are treated as parameters.



202 For any system in steady state, one of the  $P$  positive and one of the  $Q$  negative terms  
 203 will dominate over the others in each one of the  $n$  equations in the system. This gives  
 204 rise to a so-called *dominant S-System* (Savageau, 1969; Savageau et al., 2009), which  
 205 can be generically described by Eqs. 3 and 4:

206

$$207 \quad \frac{dX_i}{dt} = \alpha_{ip_i} \prod_{j=1}^{n+m} X_j^{g_{ijp_i}} - \beta_{iq_i} \prod_{j=1}^{n+m} X_j^{h_{ijq_i}} \quad i = 1, \dots, n_c \quad (3)$$

$$208 \quad 0 = \alpha_{ip_i} \prod_{j=1}^{n+m} X_j^{g_{ijp_i}} - \beta_{iq_i} \prod_{j=1}^{n+m} X_j^{h_{ijq_i}} \quad i = (n_c + 1), \dots, n \quad (4)$$

209

210 with  $p_i$  and  $q_i$  representing the indices of the dominant positive and dominant  
 211 negative terms in the  $i$ -th equation, respectively. The validity of the dominant S-System  
 212 implies certain conditions (Savageau et al., 2009; Fasani and Savageau, 2010), which  
 213 are represented by inequalities of the form

214

$$215 \quad \alpha_{ip_i} \prod_{j=1}^{n+m} X_j^{g_{ijp_i}} > \alpha_{ik} \prod_{j=1}^{n+m} X_j^{g_{ijk}} \quad \forall k = \{1, 2, 3, \dots, P_i \mid k \neq p_i\} \quad (5)$$

$$216 \quad \beta_{iq_i} \prod_{j=1}^{n+m} X_j^{h_{ijq_i}} > \beta_{ik} \prod_{j=1}^{n+m} X_j^{h_{ijk}} \quad \forall k = \{1, 2, 3, \dots, Q_i \mid k \neq q_i\}. \quad (6)$$

217

218 Here,  $k$  represents indices of corresponding non-dominant terms. Steady state  
 219 concentrations of the dependent variables can be obtained by rearranging Eqs. 3 and 4  
 220 and taking logarithms on both sides:

221 
$$\log \alpha_{ip_i} + \sum_{j=1}^{n+m} g_{ijp_i} \log X_j = \log \beta_{iq_i} + \sum_{j=1}^{n+m} h_{ijq_i} \log X_j, \quad (7)$$

222

223 which can be written in matrix form as:

224

225 
$$Ay = b, \quad (8)$$

226

227 where  $y_j = \ln X_j$ ,  $a_{ij} = g_{ijp_i} - h_{ijq_i}$  and  $b_i = \ln(\beta_{iq_i} / \alpha_{ip_i})$ . In a following step, dependent ( $y_D$ )

228 and independent ( $y_I$ ) variables are split to obtain:

229

230 
$$A_D y_D + A_I y_I = b. \quad (9)$$

231

232 The vector of dependent concentration variables  $y_D$  can be obtained by matrix

233 operations:

234 
$$y_D = -A_D^{-1} A_I y_I + A_D^{-1} b. \quad (10)$$

235

236 The flux through each metabolic pool can be obtained by a secondary matrix operation

237 (Savageau, 2009). Because some have confused S-system equations in two different

238 contexts, it should be noted that the original S-system equations were found in the

239 context of a local (Taylor series) representation in logarithmic space and involved *real-*

240 *valued* exponents (Savageau, 1969; 2009), whereas the S-system equations found in

241 the global context of the System Design Space involve positive *integer-valued*

242 exponents defined by the underlying chemical and biochemical kinetic mechanisms  
243 (Savageau et al. 2009). In any case, they have the same mathematical form, which  
244 makes them amenable to the same set of powerful linear methods.

245

### 246 **3.1.1 Biochemical Phenotypes**

247

248 The concept of *biochemical phenotype* (or simply *phenotype*) is an integral element of the  
249 Design Space formalism and will be broadly used throughout this work. A phenotype is  
250 defined in the context of a mechanistic model of a biological system. The mathematical  
251 representation of a biochemical phenotype is given by a set of dominant S-system  
252 equations (Eqs. 3 and 4) and associated boundaries, which involve a comprehensive  
253 integration of information for all the system's concentrations, fluxes, and parameters  
254 (Savageau et al., 2009; Fasani and Savageau, 2010). From a biological point of view,  
255 most of the mathematical properties of a biochemical phenotype, such as its logarithmic  
256 gains and dynamic behavior, can be experimentally measured, thus rendering  
257 biochemical phenotypes a powerful tool to design and optimize biochemical systems.  
258 Biochemical phenotypes can be categorized into two groups: pathological and  
259 physiological. The former is characterized by internal metabolic imbalances that result in  
260 the continual accumulation or depletion of at least one metabolic pool (Valderrama-  
261 Gómez et al. 2020). Conversely, physiological phenotypes exhibit at least one steady  
262 state, which can be either stable or unstable. Phenotypes have an associated case  
263 number and a signature that implies a specific set of dominance conditions.

264

### 265 3.1.2 Logarithmic Gains

266

267 Logarithmic gains are amplification factors relating changes in input signals

268 (independent variables,  $y_I$ ) to the resulting changes in output signals (dependent

269 variables,  $y_D$ ) and are denoted by the symbol  $L(y_D, y_I)$ . Strictly speaking, the term

270 parameter sensitivity is used instead of logarithmic gain when the effect of varying a

271 parameter on a dependent variable is analyzed. Both logarithmic gains and parameter

272 sensitivities are properties that depend exclusively on the kinetic orders of the system

273 and can be calculated for concentrations or fluxes (Savageau, 1971). They are valid

274 throughout the entire polytope of a given biochemical phenotype. For simplicity, we will

275 not distinguish between parameter sensitivities and logarithmic gains and will use only

276 the latter term. A logarithmic gain with a magnitude greater than one implies

277 amplification of the original signal; a magnitude less than one indicates attenuation. A

278 positive sign for the logarithmic gain indicates that the changes are in the same

279 direction (both increase, or both decrease in value), while a negative sign indicates that

280 the changes are in the opposite direction. Logarithmic gains can be calculated directly

281 from Eq. 10 as follows:

282

$$283 \quad \frac{\partial y_D}{\partial y_I} = -A_D^{-1} A_I. \quad (11)$$

284

285 In the context of the Design Space formalism, Eq. 11 implies that the calculation of

286 logarithmic gains does not involve parameter sampling or numerical integration of the

287 system of differential equations. Consequently, logarithmic gains can be used to identify  
288 metabolic engineering strategies in a computationally efficient way as illustrated in  
289 Section 4.2.

290

### 291 **3.1.3 Systems Design Space and Linear Programming**

292

293 Linear algebra and linear programming play a central role in mathematically defining and  
294 characterizing biochemical phenotypes (Fasani and Savageau, 2010). A set of dominant  
295 processes, along with an accompanying set of inequalities are only considered to  
296 represent a valid phenotype if (a) the S-system equations (Eqs. 3 and 4) have a valid  
297 steady-state solution, (b) the set of inequalities (Eqs. 5 and 6) is mathematically  
298 consistent, and (c) introducing the solution into the set of inequalities yields a consistent  
299 system. Note that step (a) is performed using linear algebra, while steps (b) and (c)  
300 involve solving a linear program in each case. Throughout this work, the Design Space  
301 Toolbox v3.0, DST3 (Valderrama-Gómez et al. 2020), was used to automatically define  
302 and solve linear programs using GLPK as the linear solver. Eqs. S25 to S40 exemplify S-  
303 system equations defining phenotype **7306\_3**, which will be of interest in later analyses.  
304 This set of equations has a valid steady-state solution, which is shown in Eqs. S58 to  
305 S73. Associated dominance conditions are represented by Eqs. S41 to S57. Substituting  
306 the steady-state solution into the dominance conditions yields Eqs. S74 to S85, which  
307 represent phenotypic boundaries delimiting a region in Design Space in which phenotype  
308 **7306\_3** is valid. A similar process is required to test each one of the potential phenotypes  
309 of a given network. DST3 efficiently automates this process, while opening new

310 applications of linear programming in the context of mechanistic modeling, as we will  
311 demonstrate in Sections 4.3 and 4.4. For conciseness, mathematical equations defining  
312 biochemical phenotypes of the amorphadiene network will not be provided explicitly but  
313 can be trivially retrieved using the accompanying Jupyter Notebooks.

314

### 315 **3.2 The Design Space Toolbox v.3.0 & Jupyter Notebooks**

316

317 The Design Space Toolbox v.3.0 (DST3) is freely available for all major operating  
318 systems through Docker. After Docker has been installed on your system, running the  
319 following commands on a terminal window will provide access to DST3:

- 320 1. `docker pull savageau/dst3:3.08.79`
- 321 2. `docker run -d -p 8888:8888 savageau/dst3:3.08.79`
- 322 3. Access the software by opening the address <http://localhost:8888/> on any  
323 internet browser.

324 Please refer to the original publication (Valderrama-Gómez et al. 2020) for detailed  
325 installation instructions and troubleshooting. Several Jupyter notebooks are provided to  
326 reproduce the modeling results of each section. Notebooks can be found within the  
327 Docker Image **savageau/dst3:3.08.79** under the directory  
328 **/Supporting\_Notebooks/AMO\_System**. The source code is available under  
329 <https://github.com/m1vg>.

330

331

332

## 333 4. Results

334

### 335 4.1 The Phenotypic Repertoire of the Amorphadiene Biosynthetic Network

336

337 We start our analysis by recasting the system of differential equations describing the  
338 dynamics of the amorphadiene network (Eqs. S1 to S8) into a fully equivalent GMA form  
339 (Eqs. S9 to S24), in which all terms are expressed using power laws. This format is  
340 suitable for analysis using DST3 (Valderrama-Gómez et al. 2020). In a following step,  
341 the network's phenotypic repertoire is enumerated along with dynamic properties  
342 (number of eigenvalues with positive real part) and volume of individual phenotypes in  
343 the System Design Space. This information is summarized in the Supplementary File 1.  
344 Note that co-dominant phenotypes were considered for this system (refer to  
345 Supplementary Section 4 for details). The amorphadiene network exhibits 40  
346 physiological phenotypes within a parameter range of  $10^{-3}$  to  $10^3$  in all dimensions and a  
347 total logarithmic volume of  $6.25 \times 10^{16}$ . This implies that only about 0.0367% of the 26-  
348 dimensional Design Space (with a total logarithmic volume of  $6^{26}$ ) can support viable  
349 biological phenotypes. These numbers suggest that identifying stable operating points  
350 by randomly sampling the parameter space is highly inefficient, which is a technique  
351 commonly used by ensemble modeling approaches to parameterize mechanistic  
352 models (Lee et al., 2014).

353 The phenotypic repertoire can be filtered to identify top-performing phenotypes  
354 without *a priori* knowledge of parameter values. For that, we use the maximum fold  
355 change in production flux from a phenotype's nominal operating point as the

356 performance metric. When evaluating specific phenotypic properties that depend on a  
357 phenotype's operating point (e.g., eigenvalues, parameter tolerances, phenotype-  
358 specific mutation rates (Valderrama-Gómez and Savageau, 2021)), linear programming  
359 methods can be applied to identify a nominal parameter set (Lomnitz and Savageau,  
360 2016). The results of this phenotypic assessment are summarized in Fig. S1 as a  
361 heatmap. Phenotypes **6921\_3**, **6913\_3**, **5769** and **7306\_3** exhibit the highest potential  
362 to increase production flux from their respective operating point. Phenotype **7306\_3** is of  
363 central interest in this study, because, as we will show below, it contains the operating  
364 point of one of the strains characterized by Weaver et al. (2015).

365 Available experimental data (such as multi-omics and enzyme kinetics) can be  
366 integrated within the phenotype-centric modeling strategy to create a link between  
367 observable phenotypic features and regions in Design Space. In the case of the base  
368 strain mbis3, experimentally determined protein concentrations (Table S1), along with  
369 kinetic parameters extracted from the literature (Table S2), locate the system's  
370 operating point within phenotype **7306\_3**, as indicated in Fig. 2A by the black circle.  
371 Interestingly, this phenotype was identified in our previous analysis as a potential top  
372 performer, which means that the mathematical abstraction for phenotype **7306\_3** can  
373 be readily used in combination with linear programming to engineer mbis3 into a high  
374 performing production strain. Dynamic properties of the strain mbis3 can be determined  
375 by an eigenvalue analysis of phenotype **7306\_3** (Table S3), which predicts a stable  
376 steady state (all eigenvalues are negative real). Numerical integration of the full system  
377 of differential equations confirms this prediction (Fig. 2B). Parameter perturbations can  
378 move the system's operating point outside of phenotype **7306\_3**. For instance,



379 increasing the concentration of the enzyme amorphadiene synthase (ADS) shifts the  
380 operating point from phenotype **7306\_3** to **7330\_3**, as shown in Fig. 2A by the diamond-  
381 shaped symbol. Since the S-system representing phenotype **7330\_3** exhibits complex  
382 conjugate eigenvalues with positive real part at the denoted operating point (Table S3),  
383 the intracellular metabolite concentrations of the network are predicted to exhibit an  
384 oscillatory behavior, which is confirmed in Fig. 2C by numerical integration. The ADS  
385 concentration can be further increased to place the operating point within a region in  
386 Design Space lacking a physiological phenotype (Fig. 2A, black triangle). Thus, some  
387 metabolites (MevP, MevPP, and IPP) will not reach a steady state, as shown in Fig. 2D.  
388 This behavior arises due to metabolic imbalances present in pathological regions of the  
389 Design Space.

390 The different dynamic regimes shown in Fig 2. can be rationalized in terms of the  
391 operation of an integral control system (Aström and Murray, 2010), and the saturation of  
392 the enzyme ISPA. The control system, mechanistically implemented by the feedback  
393 inhibition of MK by FPP, integrates the difference between the pathway input and output  
394 flux to produce the error signal FPP. For example, an increase in ADS increases the  
395 output flux and initially decreases its substrate FPP. The decrease in FPP causes de-  
396 inhibition of MK and an increase in the input flux until it matches the increased output  
397 flux and the change in the error signal FPP goes to zero. As ADS is increased from its  
398 initial operating point (Fig. 2B), a switch to phenotype **7330\_3** occurs, leaving the  
399 integral control system at the boundary of instability and causing oscillations in the  
400 concentration of intracellular metabolites (Fig. 2C). With still further increases in ADS  
401 and consequent decreases in FPP, there is further de-inhibition of MK to the point that

402 the increase in the input flux exceeds the  $V_{\max}$  of ISPA, which then becomes the  
 403 limiting step (see second row of Table 1). The saturation of ISPA leads to a new steady  
 404 state for FPP that is lower with each further increase in ADS, while GPP, DMAPP and  
 405 AMO maintain a new steady state dictated by the rate limiting flux through ISPA. The  
 406 de-inhibition of MK and increased input flux causes a buildup of metabolites behind the  
 407 ISPA bottleneck: MevP, MevPP and IPP (Fig. 2D).  
 408

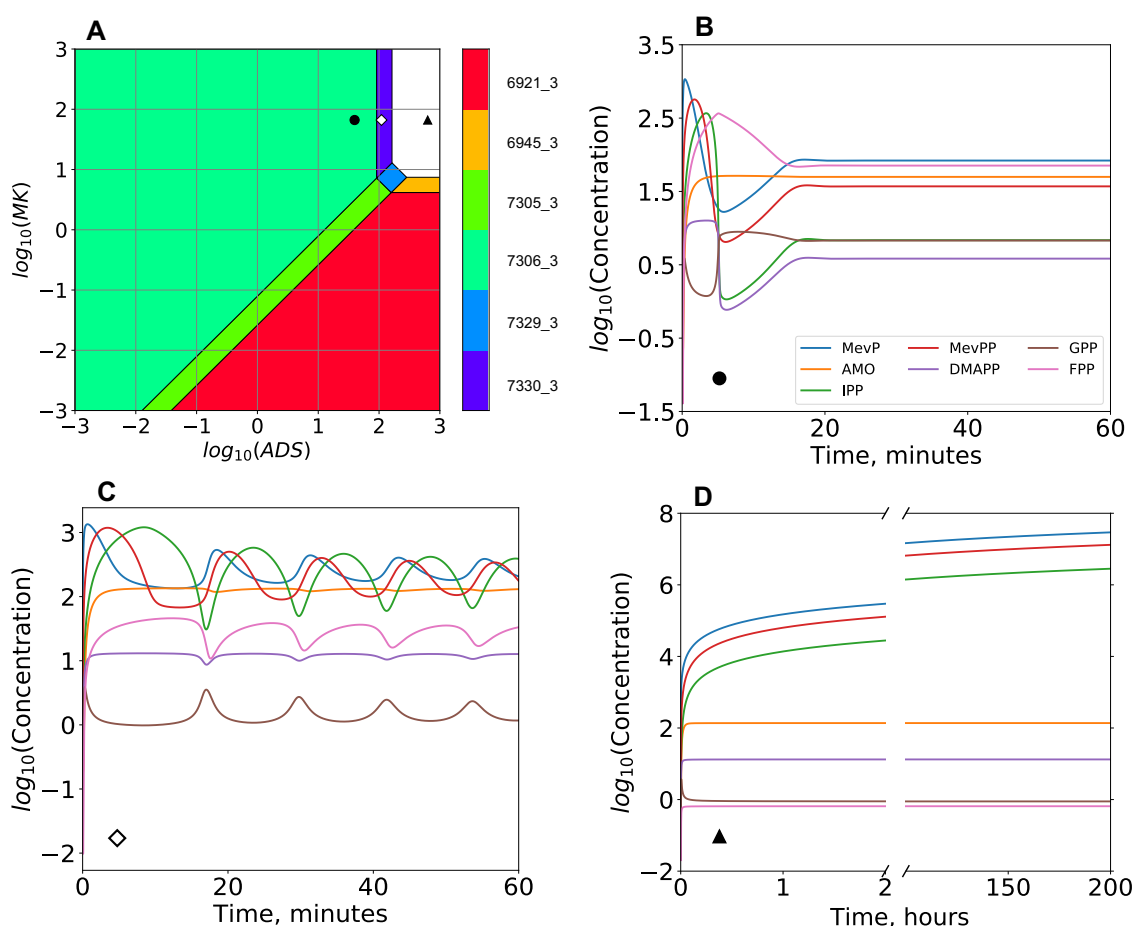

409  
 410 **Figure 2. A System Design Space Plot and Three Dynamic Regimes of the**  
 411 **Amorphadiene Network. A.** A Design Space Plot of the amorphadiene biosynthetic  
 412 network generated for the system defined by Eqs. S9 to S24. Color-coded regions  
 413 represent biochemical phenotypes of the network. The black circle within phenotype  
 414 **7306\_3** represents the operating point for the base strain mbis3. Kinetic parameters and  
 415 experimentally determined enzyme concentrations for mbis3 can be found in Tables S1

416 and S2, which are reproduced from Weaver et. al. (2015). The white diamond symbol  
417 within phenotype **7330\_3** and the neighboring black triangle in the upper right white region  
418 represent hypothetical strains in which the  $\log_{10}$  concentration of ADS is increased to 2.04  
419 and 2.8, respectively. Panels **B** to **D** show the temporal behavior of intracellular metabolic  
420 pools for these three operating points. Each case differs from the other solely by the  
421 concentration of ADS. Initial metabolite concentrations were assumed to have a value of  
422 0.1  $\mu\text{M}$  except for mevalonate, whose concentration was set to have a constant value of  
423 5  $\mu\text{M}$ . Numerical integration was performed using the ODEINT routine of SciPy and  
424 10,000 steps. **B.** Stable network dynamics for the base strain mbis3 (black circle in panel  
425 **A**). **C.** Oscillatory network dynamics resulting from increasing  $\log_{10}(\text{ADS})$  to 2.04 (white  
426 diamond in panel **A**). **D.** Pathological system dynamics when  $\log_{10}(\text{ADS})$  is further  
427 increased to 2.8 (black triangle in panel **A**). Note that MevP, MevPP and IPP can no  
428 longer reach a steady state but continuously accumulate over time.

429

430

#### 431 **4.2A Logarithmic Gain Analysis Reveals a Global Landscape of Metabolic**

#### 432 **Engineering Strategies**

433

434 Here, we calculate logarithmic gains in production flux for each one of the 40 physiological  
435 phenotypes of the amorphadiene network. The goal is to identify system parameters with  
436 the potential to increase amorphadiene productivity. Engineering strategies can be  
437 identified from a logarithmic gain analysis using the following rationale: increasing the  
438 value of a parameter will enhance productivity when the parameter exhibits a positive  
439 logarithmic gain. Conversely, decreasing its value will increase pathway flux when the  
440 parameter exhibits a negative logarithmic gain. The global landscape of metabolic  
441 engineering strategies based on a logarithmic gain analysis is shown in Fig. 3. It can be  
442 divided into four different phenotypic groups according to non-zero logarithmic gains for  
443 kinetic parameters associated with a characteristic enzyme set. Each group consists of  
444 10 phenotypes. The first group is characterized by non-zero logarithmic gains for kinetic  
445 parameters linked with the last enzyme in the pathway, ADS. The base strain mbis3,  
446 whose operating point is located within phenotype **7306\_3** (Fig. 2A), belongs to this

447 group. The second and third groups are both characterized by non-zero logarithmic gains  
 448 for kinetic parameters associated with the first enzyme in the pathway, the mevalonate  
 449 kinase (MK). Finally, phenotypes within the fourth group exhibit non-zero logarithmic  
 450 gains for both MK and ADS. Note that Fig. 3 represents the entire landscape of metabolic  
 451 engineering strategies and is solely based on the architecture of the amorphadiene  
 452 network (Eqs. S9 to S24). In the context of this analysis, model parameterization is  
 453 optional and allows the identification of relevant strategies by placing the system's  
 454 operating point within one of the four phenotypic groups. In the specific case of strain  
 455 mbis3, Fig. 3 proposes increasing the concentration of ADS or its turnover number ( $k_{cat7}$ )  
 456 as suitable intervention strategies, which is in line with numerical simulations performed  
 457 by Weaver et al. (2015).

458

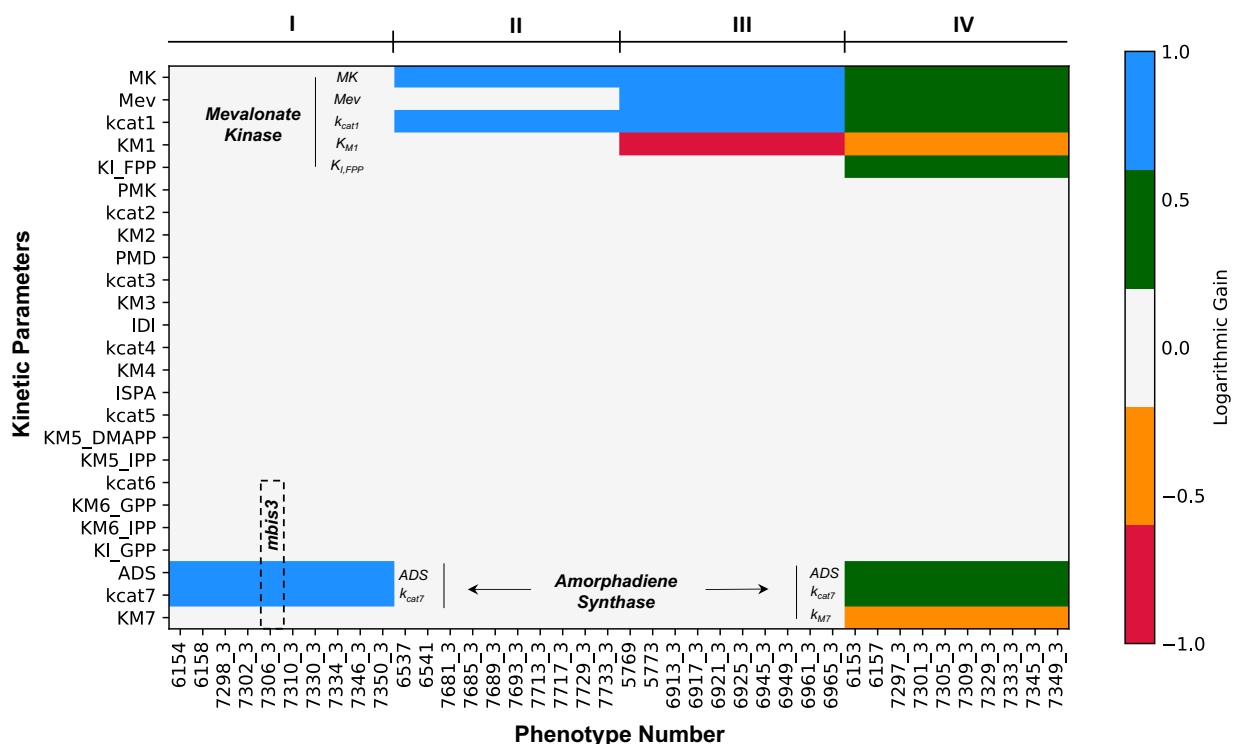

459 **Figure 3. Logarithmic Gains in Pathway Flux Calculated for Physiological**  
 460 **Phenotypes.** A landscape of 1,040 different logarithmic gains calculated for 40  
 461

462 biochemical phenotypes (x-axis) across 26 system parameters (y-axis) for the  
463 amorphadiene production flux,  $L(r_{out}, i)$ , is shown as a heat map. Logarithmic gain values  
464 are color-coded; the white background represents a logarithmic gain of 0. Blue represents  
465 a value of 1, green corresponds to 0.5, orange to -0.5 and red corresponds to -1. The  
466 rectangle with a black dashed outline highlights phenotype **7306\_3**, which contains the  
467 operating point of the base strain mbis3. Refer to Supplementary File 3 for the figure's  
468 raw data.

469

470

471 Phenotype signatures (Savageau et al. 2009, Valderrama-Gómez et al. 2020) encode  
472 necessary instructions to construct S-system equations (i.e., Eqs. 3 and 4) from the full  
473 system of differential equations. From a biological point of view, these signatures contain  
474 information about dominant fluxes and biochemical mechanisms exercised by each  
475 phenotype. An analysis of *conserved* dominance signatures (Table S4 and S5) for  
476 individual groups in Fig. 3 reveals that saturation patterns of two key enzymes (MK, and  
477 ADS, see Table. S6 and Fig. S2) can be used to differentiate individual phenotypic  
478 groups. Further, this suggests that a targeted enzymatic characterization has the potential  
479 to rapidly assign a given strain to one of these four groups. For instance, groups II and III  
480 differ solely by the saturation features of MK (Fig. S2). Since the mevalonate  
481 concentration is the largest positive term in Eq. S16 for all phenotypes within group II, we  
482 consider the enzyme MK to be saturated. Conversely, the same enzyme is *not* saturated  
483 in group III because  $K_{M1}$  is the largest positive term in Eq. S16. These saturation  
484 differences directly influence engineering strategies, as evidenced in Fig. 3 (compare  
485 groups II and III). When MK is saturated, increasing the mevalonate kinase concentration  
486 (MK) or its turnover number ( $k_{cat1}$ ) are the only two possible strategies to significantly  
487 increase amorphadiene productivity. However, if MK is *not* saturated, increasing the  
488 mevalonate concentration and decreasing the Michaelis-Menten constant  $K_{M1}$  are two  
489 additional strategies that can be implemented to increase productivity. Several other

490 analogous comparisons can be made. Let us consider the saturation patterns of  
491 phenotypic groups III and IV. At a first glance, there are no obvious differences in the  
492 enzyme saturation pattern of these two groups (see Table S6 and Figure S2). In each  
493 case, the key enzymes MK and ADS are not saturated. However, a detailed inspection of  
494 the MK saturation regime in group IV reveals an important difference. While  $K_{M1}$  is the  
495 largest positive term in Eq. S16 for all phenotypes within group III, the inhibition term  $K_{M1}$   
496  $\cdot FPP \cdot K_{I,FPP}^{-1}$  is the largest one in group IV. The consequences of this subtle difference  
497 in dominance are reflected in additional engineering strategies involving not only MK but  
498 also ADS in group IV (refer to Fig. 3, groups III vs. IV). Increasing  $K_{I,FPP}$  positively impacts  
499 productivity in group IV because it reduces the aggregate Michaelis-Menten constant for  
500 MK ( $K_{M1} \cdot FPP \cdot K_{I,FPP}^{-1} + K_{M1}$ ). Additionally, increasing ADS,  $k_{cat7}$  or decreasing  $K_{M7}$   
501 accomplishes the same goal by decreasing the steady state value of the metabolic  
502 intermediate FPP (Fig. 1) –which can be inferred by a logarithmic gain analysis for the  
503 exemplary phenotype **7333\_3** within group IV:  $L(FPP, ADS) = -0.5$ ,  $L(FPP, k_{cat7}) = -0.5$ ,  
504 and  $L(FPP, K_{M7}) = 0.5$ .

505

### 506 **4.3 Identifying Coupled Enzyme Targets**

507

508 Using numerical simulation and a partial rank correlation analysis for a set of 10,000  
509 models, Weaver et al. (2015) identified the concentration of ADS and its turnover  
510 number ( $k_{cat7}$ ) as the most relevant parameters to increase amorphadiene productivity.  
511 To refine model predictions, the authors experimentally determined the *in vivo* value for  
512  $k_{cat7}$ , which they estimated to be  $0.022 \pm 0.008 \text{ s}^{-1}$ . This number is significantly different

513 from the value extracted from the literature ( $0.0068 \text{ s}^{-1}$ ). Fig. 4A shows a Design Space  
 514 plot for the amorphadiene network with an updated  $k_{\text{cat}7}$  value. Note that the qualitative  
 515 arrangement of neighboring phenotypes, as well as the location of the operating point of  
 516 the base strain mbis3 within phenotype **7306\_3**, remain unchanged when the  $k_{\text{cat}7}$  value  
 517 extracted from the literature is used instead (refer to the Supplementary IPython  
 518 Notebook 4.1 within the DST3 Docker Image).

519

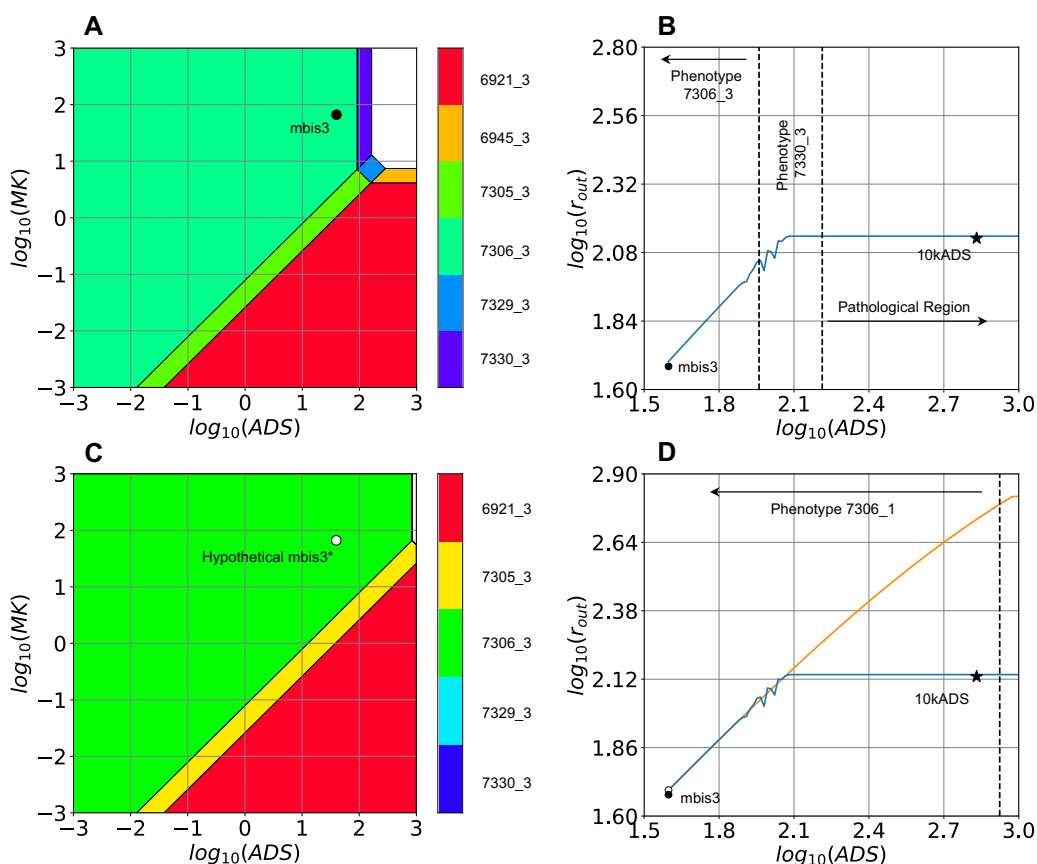

520  
 521 **Figure 4. System Design Space Plots and *in silico* Titration Studies.** **A.** A Design  
 522 Space plot for strain mbis3 (black circle within phenotype **7306\_3**) is shown. **B.** A titration  
 523 plot (solid blue line) is generated for the ODE system (Eqs. S1 – S8) by increasing the  
 524 expression level of ADS from its basal concentration of  $39.6 \mu\text{M}$  in strain mbis3 to  $1,000 \mu\text{M}$ .  
 525 The two vertical dashed lines mark the boundaries of phenotype **7330\_3**. Operating  
 526 points located within this biochemical phenotype have the potential to exhibit oscillatory  
 527 behavior, qualitatively similar to the one shown in Fig. 2C. The average slope of the  
 528 titration curve within the boundaries of phenotype **7306\_3** is 0.98, which closely matches  
 529 a logarithmic gain of  $L(r_{\text{out}}, \text{ADS}) = 1$  calculated for phenotype **7306\_3** (Fig. 3) using linear

530 algebra. Experimental amorphaadiene production rates for strains mbis3 and 10kADS are  
531 represented by a black star and a black circle, respectively. **C.** A Design Space plot is  
532 shown for the hypothetical strain mbis3\* (white circle within phenotype **7306\_3**). This  
533 strain results from increasing the levels of PMK (1.91-fold), IDI (3.04-fold), PMD (5.14-  
534 fold), and ISPA (9.2-fold), from the respective levels of the base strain mbis3. **D.** A titration  
535 plot for the ODE system (solid orange line) is generated by increasing the expression  
536 level of ADS from its basal concentration of 39.6  $\mu\text{M}$  in the hypothetical strain mbis3\*  
537 (white circle) to 1,000  $\mu\text{M}$ . The blue solid line corresponds to the titration study performed  
538 in panel **B**. The vertical dashed line represents the right boundary of phenotype **7306\_3**.  
539 Experimental productivity of the strains mbis3 and 10kADS are represented by a black  
540 circle and a black star, respectively. The average slope of the titration curve within  
541 phenotype **7306\_1** is 0.82, in close agreement with a logarithmic gain of  $L(r_{\text{out}}, \text{ADS}) = 1$   
542 calculated for the same phenotype. Average slopes are determined by computing two-  
543 point slopes and averaging their values over the entire curve.

544  
545 To test the effect of increasing ADS expression on amorphaadiene productivity,  
546 Weaver et al. (2015) constructed and characterized the strain 10kADS, which contains  
547 a stronger ribosome binding site in front of the ADS sequence. The experimentally  
548 determined ADS concentration in 10kADS was 678  $\mu\text{M}$ , which corresponds to a 17-fold  
549 increase compared with its level in the base strain mbis3 (39.6  $\mu\text{M}$ ). As reported by the  
550 authors, there is a good agreement between model predictions (blue line in Fig. 4B) and  
551 the experimental performance of strain 10kADS (black star in Fig. 4B). Our logarithmic  
552 gain analysis for phenotype **7306\_3** not only predicts the fact that increasing ADS  
553 expression will increase amorphaadiene productivity (Fig. 3), but it also provides an  
554 estimate for the magnitude of such an increase. A good agreement is observed  
555 between the slope of the blue curve to the left of the leftmost vertical line in Fig. 4B,  
556 whose value corresponds to 0.98, and the calculated logarithmic gain for the pathway  
557 flux,  $L(r_{\text{out}}, \text{ADS}) = 1$ , for phenotype **7306\_3**. Note that an experimental  $\log_{10}(\text{ADS})$  value  
558 of 2.8 places the operating point for strain 10kADS outside the boundaries of phenotype  
559 **7306\_3**, well within the pathological region to the right of phenotype **7330\_3** (Fig. 4A  
560 and B). The location of the operating point of strain 10kADS is relevant because the



561 predicted positive effect of ADS overexpression on amorphadiene productivity is only  
562 valid within the boundaries of phenotype **7306\_3**, for which a logarithmic gain of  $L(r_{out},$   
563  $ADS) = 1$  is calculated. As shown in Fig. 4B, after  $\log_{10}(ADS)$  surpasses the right  
564 boundary of phenotype **7330\_3** (rightmost vertical dashed line), further increasing ADS  
565 does not translate into a higher amorphadiene synthesis rate. Instead, overexpressing  
566 ADS at higher levels can potentially decrease strain performance due to the  
567 accumulation of toxic metabolites (MevPP, MevP and IPP, see Fig. 2D) and the  
568 associated protein burden.

569         Since  $L(r_{out}, ADS) = 1$  is only valid within the boundaries of phenotype **7306\_3**  
570 (Eqs. S74-S85), identifying additional engineering targets to increase pathway  
571 performance is analogous to identifying enzyme perturbations that allow higher ADS  
572 expression levels within the boundaries of phenotype **7306\_3**. We exploit linearities in  
573 the mathematical definition of biochemical phenotypes in logarithmic space to formulate  
574 and solve this optimization task using linear programming. Starting from the operating  
575 point of the base strain mbis3, we allow the concentration of a set of enzymes, including  
576 ADS, to vary within the range  $10^{-3}$  to  $10^3$ . Note that this range can be easily adjusted if  
577 needed. Then, the concentration of the free enzymes is adjusted so that the expression  
578 of ADS is maximal within the boundaries of phenotype **7306\_3**. We perform this  
579 procedure varying the number of free enzymes from 1 to 4. The results are summarized  
580 in Table 1. Adjusting the expression level of the enzymes PMK, IDI, PMD, and ISPA as  
581 indicated in the last row of Table 1, would allow the resulting hypothetical strain mbis3\*  
582 (Fig. 4C) to support a maximal ADS expression of 838  $\mu$ M, which is higher than the  
583 ADS level in strain 10kADS (678  $\mu$ M). The effect of increasing ADS to this level on

584 amorphadiene productivity is shown in Fig. 4D by the intersection of the orange curve  
 585 and the dashed vertical line. As ADS is increased, so does the production flux through  
 586 the amorphadiene network. The average slope of the orange curve to the left of the  
 587 vertical dashed line is 0.82 and agrees well with a predicted logarithmic gain for  
 588 phenotype **7306\_3** of  $L(r_{out}, ADS)=1.0$ . The net effect of adjusting the concentrations of  
 589 PMK, IDI, PMD and ISPA is to extend the region of validity of phenotype **7306\_3**  
 590 (compare Figs. 4A and 4C). Consequently, the network could support a productivity of  
 591 608  $\mu\text{M}/\text{min}$ , which represents a 4.5-fold increase compared with the experimental  
 592 productivity for strain 10kADS (135  $\mu\text{M}/\text{min}$  or 2.25  $\mu\text{M}/\text{s}$ ).

593

594 **Table 1. Enzyme Perturbations Enabling Higher Expression Levels of ADS.** Maximal  
 595 ADS expression values supported by phenotype **7306\_1** are listed for multiple conditions.  
 596 The first row corresponds to the maximal ADS expression supported by the base strain  
 597 mbis3. Rows 2 to 5 represent hypothetical strains resulting from perturbations of a given  
 598 set of enzymes (first column) by an amount indicated in the second column.  
 599

| Perturbed Enzymes               | Fold-Change From mbis3            | Maximal ADS Expression Value ( $\mu\text{M}$ ) |
|---------------------------------|-----------------------------------|------------------------------------------------|
| <b>ADS</b>                      | +2.3                              | 91.21                                          |
| <b>ISPA, ADS</b>                | +1.79, +4.12                      | 163                                            |
| <b>PMD, ISPA, ADS</b>           | +1.69, +3.03, +6.97               | 276                                            |
| <b>IDI, PMD, ISPA, ADS</b>      | +1.59, +2.69, +4.82, +11.1        | 439                                            |
| <b>PMK, IDI, PMD, ISPA, ADS</b> | +1.91, +3.04, +5.14, +9.2, +21.18 | 838                                            |

600

601

602 Note that the intervention strategies listed in Table 1 can also be obtained from a  
 603 manual boundary analysis for phenotype **7306\_3** (Eqs. S74-S85). For instance, the  
 604 maximal ADS value in the first row of Table 1 is dictated by Eq. S79. The same

605 equation also points to ISPA as the first enzyme whose level needs to be fine-tuned to  
606 allow for a higher ADS expression. Furthermore, Eq. S78 identifies PMD as an  
607 additional target, followed by IDI and PMK, which are identified through Eqs. S74 and  
608 S77, respectively. An automated analysis of phenotypic boundaries by linear  
609 programming will be the method of choice as the network's scope and number of  
610 inequalities increase.

611         Since experimentally implementing the fold-change values listed in Table 1 for  
612 perturbed enzymes might be challenging because of technical difficulties associated  
613 with continuous titration of enzyme levels, *integer* linear programming (Schrijver, 1986)  
614 provides an alternative approach to increase the biological feasibility of the strategies  
615 identified from a boundary analysis for phenotype **7306\_3**. From an experimental point  
616 of view, these intervention strategies could be implemented more easily, for instance, by  
617 fine-tuning the copy number of plasmids harboring target enzymes. The biological  
618 feasibility of the predictions could be further refined by considering appropriate  
619 constraints on the total number of plasmids that can be supported by the cell.

620

#### 621 **4.4 Modulating Feedback Inhibition as a Valid Engineering Strategy**

622

623 Mevalonate kinase (MK), the first enzyme of the pathway, is subjected to feedback  
624 inhibition by the pathway intermediate farnesyl diphosphate (FPP) (Miziorko, 2011).  
625 Weaver et al. (2015) hypothesized that alleviating feedback inhibition in MK could  
626 increase amorphadiene productivity. A logarithmic gain analysis for biochemical  
627 phenotype **7306\_3** (Fig. 3), which contains the operating point of the base strain mbis3

628 (Fig. 4A), indicates that the pathway flux ( $r_{out}$ ) is *insensitive* to perturbations in  $K_{I,FPP}$ ,  
629 i.e.,  $L(r_{out}, K_{I,FPP}) = 0.0$ . Similarly, but using numerical simulation, Weaver et al. (2015)  
630 observed no significant effect of perturbations in  $K_{I,FPP}$  on pathway flux. To  
631 experimentally validate this observation, the authors constructed and characterized  
632 strain saMK containing a homologous mevalonate kinase from *Staphylococcus aureus*  
633 with a 24-fold weaker  $K_{I,FPP}$ . In line with our logarithmic gain analysis and numerical  
634 simulations by Weaver et al. (2015), the experimental amorphaadiene production in  
635 strain saMK was not sensitive to mevalonate kinase inhibition.

636 **Table 2. Biochemical Phenotypes Responding to Changes in  $K_{I,FPP}$ .** Relevant  
637 logarithmic gains and phenotypic volumes in logarithmic space are listed for ten  
638 phenotypes for which  $L(r_{out}, K_{I,FPP}) \neq 0$ . In each case, the pathway flux ( $r_{out}$ ) can be  
639 increased by modifying parameter values associated with either MK or ADS. Phenotypic  
640 volumes are calculating using the tolerance method, which provides an underestimate  
641 (Valderrama-Gómez and Savageau, 2021). By virtue of its volume, phenotype **6153** is  
642 considered as the most robust to parametric perturbations.  
643

| Phenotype<br>Number | Mevalonate Kinase       |                                                                 |                      | Amorphadiene Synthase                       |                      | Log<br>Volume |
|---------------------|-------------------------|-----------------------------------------------------------------|----------------------|---------------------------------------------|----------------------|---------------|
|                     | $L(r_{out}, K_{I,FPP})$ | $L(r_{out}, MK)$<br>$L(r_{out}, Mev)$<br>$L(r_{out}, k_{cat1})$ | $L(r_{out}, K_{M1})$ | $L(r_{out}, ADS)$<br>$L(r_{out}, k_{cat7})$ | $L(r_{out}, K_{M7})$ |               |
| 6153                | 0.5                     | 0.5                                                             | -0.5                 | 0.5                                         | -0.5                 | 2.72e+15      |
| 6157                | 0.5                     | 0.5                                                             | -0.5                 | 0.5                                         | -0.5                 | 3.07e+14      |
| 7305_3              | 0.5                     | 0.5                                                             | -0.5                 | 0.5                                         | -0.5                 | 1.65e+14      |
| 7297_3              | 0.5                     | 0.5                                                             | -0.5                 | 0.5                                         | -0.5                 | 1.1e+14       |
| 7329_3              | 0.5                     | 0.5                                                             | -0.5                 | 0.5                                         | -0.5                 | 3.22e+12      |
| 7333_3              | 0.5                     | 0.5                                                             | -0.5                 | 0.5                                         | -0.5                 | 1.33e+12      |
| 7349_3              | 0.5                     | 0.5                                                             | -0.5                 | 0.5                                         | -0.5                 | 4.88e+11      |
| 7309_3              | 0.5                     | 0.5                                                             | -0.5                 | 0.5                                         | -0.5                 | 4.51e+10      |
| 7301_3              | 0.5                     | 0.5                                                             | -0.5                 | 0.5                                         | -0.5                 | 2.73e+10      |
| 7345_3              | 0.5                     | 0.5                                                             | -0.5                 | 0.5                                         | -0.5                 | 1.41e+10      |

644

645 We now employ the phenotype-centric approach to answer two related  
646 questions: a) does a biological phenotype exist for which modulating the MK feedback

647 inhibition is a valid strategy to increase amorphadiene productivity? and b) what is the  
648 effect of completely removing MK inhibition on the global landscape of valid engineering  
649 strategies increasing amorphadiene production? We use Fig. 3 to answer the first  
650 question. A logarithmic gain of  $L(r_{out}, K_{I,FPP}) = 0.5$  in the fourth phenotypic group points  
651 to the existence of ten different biochemical phenotypes harboring operating points for  
652 which increasing values of  $K_{I,FPP}$  lead to an increased amorphadiene productivity.  
653 These phenotypes are listed in Table 2, along with their phenotypic volumes in  
654 logarithmic space (a proxy of phenotypic robustness) and non-zero logarithmic gains for  
655 pathway flux. To demonstrate the power of the phenotype-centric strategy to efficiently  
656 explore the Design Space using linear programming, we aim to identify an operating  
657 point within phenotype **6153** fulfilling two conditions:  $K_{I,FPP} > 1.9 \mu\text{M}$  and  $r_{out} > 50$   
658  $\mu\text{M}/\text{min}$ . These constraints are employed to identify an operating point which is  
659 comparable with that of the base strain mbis3. Starting from the mbis3 operating point,  
660 parameter values of a “free set” (which includes  $K_{I,FPP}$ ) are allowed to vary within the  
661 range  $10^{-3}$  to  $10^3$ . If phenotype **6153** is valid within the resulting high-dimensional cube,  
662 the tolerance for  $K_{I,FPP}$  is calculated (minimum and maximum value) using linear  
663 programming. This procedure was initially performed for free sets containing only  
664 protein concentrations (MK, PMK, PMD, IDI, ISPA and ADS). The underlying idea was  
665 to identify an operating point within phenotype **6153** that could be experimentally  
666 reached starting from mbis3 by simply adjusting the expression of a given set of  
667 enzymes. However, this was not possible for free sets of any size ( $n=1, 2, \dots, 5$  and  $6$ ).  
668 Thus, free sets were expanded to consider not only protein concentrations, but also  
669 enzyme kinetic parameters. Fig. 5A shows the location of one of such operating points

670 (white circle) within phenotype **6153** obtained using this procedure. We term this  
 671 operating point mbis3\*\*. Reaching mbis3\*\* requires fine tuning ADS, ISPA, and  $K_{M7}$  to  
 672 have values of 163  $\mu\text{M}$ , 105.9  $\mu\text{M}$  and 1,000  $\mu\text{M}$ , respectively, while keeping all other  
 673 kinetic parameters of the base strain mbis3 unchanged. As shown in Fig. 5B, alleviating  
 674 MK feedback inhibition in the hypothetical strain mbis3\*\* leads to a 4-fold improvement  
 675 in productivity. This is in stark contrast with the experimental performance of strain  
 676 saMK, whose amorphadiene productivity remained almost unchanged after alleviating  
 677 MK inhibition by the same extent.  
 678

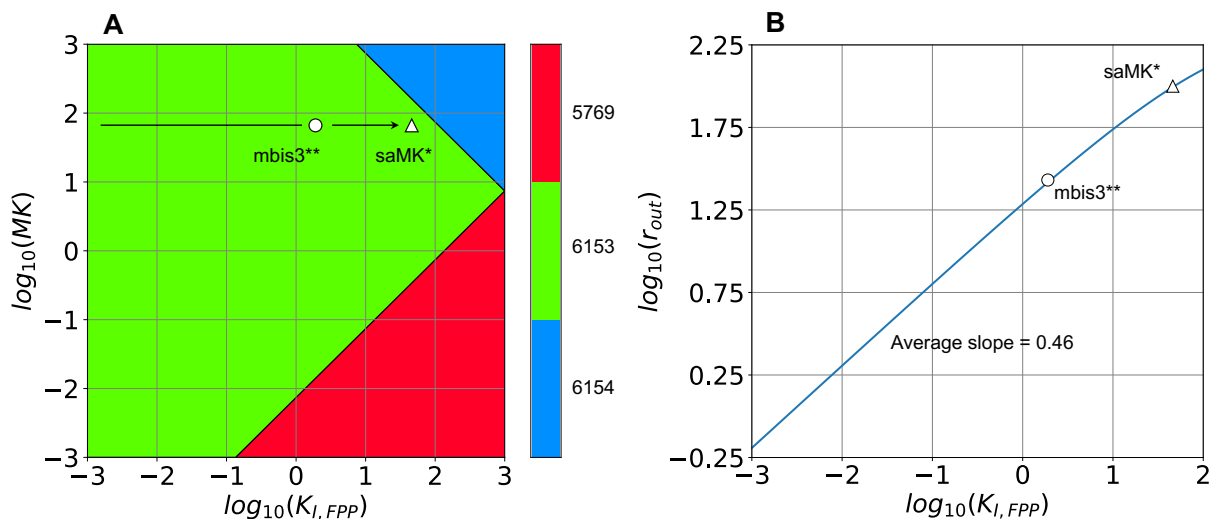

679  
 680  
 681 **Figure 5. Design Space and Titration Plots for Phenotype 6153.** **A.** The relative  
 682 locations of strains mbis3\*\* (white circle) and saMK\*\* (white triangle) within phenotype  
 683 **6153** are shown. Mbis3\*\* is a hypothetical strain resulting from setting ADS = 163  $\mu\text{M}$ ,  
 684 ISPA = 106  $\mu\text{M}$  and  $K_{M7}$  = 1,000  $\mu\text{M}$  while keeping all other kinetic parameters of the base  
 685 strain mbis3 unchanged. Strain saMK\* is also a hypothetical strain that results from  
 686 alleviating MK inhibition in mbis3\*\* by increasing its  $K_{I,FPP}$  from 1.9  $\mu\text{M}$  to 46  $\mu\text{M}$ . **B.** The  
 687 estimated amorphadiene productivity for mbis3\*\* corresponds to 27  $\mu\text{M}/\text{min}$  and is lower  
 688 than the base strain mbis3, which corresponds to roughly 48  $\mu\text{M}/\text{min}$  (Fig. 5 in Weaver et  
 689 al., 2015). The predicted amorphadiene productivity of strain saMK\* is 100  $\mu\text{M}/\text{min}$ , which  
 690 is over 2.5-fold higher than the experimentally determined value for the strain saMK (Fig.  
 691 5 in Weaver et al., 2015). The slope of the titration plot agrees well with a predicted  
 692 logarithmic gain of  $L(r_{out}, K_{I,FPP}) = 0.5$  for phenotype **6153**.  
 693

694 We now turn our attention to the second question: what is the effect of completely  
695 removing MK inhibition on the global landscape of valid engineering strategies  
696 increasing amorphadiene production? As demonstrated in Section 4.2, the phenotype-  
697 centric approach can be used to elucidate the mechanistic link between a network's  
698 architecture and its function. Thus, we explore *in silico* the structural effect of completely  
699 removing MK feedback inhibition (Fig. S5A) on engineering strategies increasing  
700 production flux. As shown in Fig. S5B, removing  $K_{I,FPP}$  from Eqs. S16 eliminates  
701 phenotypic groups I and IV from the original landscape of metabolic engineering  
702 strategies (Fig. 3). Interestingly, and as a direct consequence of this structural  
703 modification, a logarithmic gain analysis suggests that overexpressing ADS or  
704 increasing its turnover number  $k_{cat7}$  would no longer increase pathway flux, as was the  
705 case for strain mbis3 (located within phenotypic group I). A simple mathematical  
706 analysis (refer to Supplementary Section 5) can be used to calculate equivalent  
707 operating points for the modified network without feedback inhibition. Figs. S5C and  
708 S5D show the location of two such operating points. Since in each case the operating  
709 points are located on a phenotypic boundary involving MK, overexpressing the  
710 concentration of this enzyme to increase amorphadiene productivity can potentially lead  
711 to metabolic imbalances and a decreased product yield.

712

713

714

715

716

## 717 **5. Discussion**

718

719 The notion that predictions from kinetic models are context specific and only informative  
720 under the conditions for which the underlying kinetic model has been parameterized is  
721 commonly accepted (Chowdhury et al., 2015). However, to the best of our knowledge, a  
722 mathematical formalism that generates predictions while providing the biological context  
723 in which those predictions are valid is still missing in the field of rational Metabolic  
724 Engineering. In Section 4.2, we showed that the phenotype-centric strategy generates  
725 predictions from mechanistic models without requiring parameterization or numerical  
726 integration of the underlying system of differential equations. Additionally, we showed  
727 that the context in which model predictions are valid is provided by the boundaries of  
728 the biochemical phenotype from which those predictions stem (Fig. 4B). For the case  
729 study analyzed here, Weaver et al. (2015) increased amorphadiene productivity by  
730 overexpressing the enzyme ADS from a low level in the base strain mbis3 to a high  
731 level in the production strain 10kADS. Since the biological context in which the positive  
732 effect of ADS overexpression on productivity was not considered to fine-tune ADS  
733 expression experimentally, a too high ADS level in strain 10kADS effectively placed its  
734 operating point within a pathological region of the Design Space (Fig. 4B).  
735 Consequently, metabolic intermediates (MevP, MevPP and IPP) have the potential to  
736 accumulate to toxic levels (Fig. 2D) in this strain. By confining ADS overexpression to  
737 the boundaries of the physiological phenotype **7306\_3**, as shown in Fig. 4B, the  
738 resulting production strain could have the potential to outperform strain 10kADS in



739 terms of product yield, due to balanced intracellular metabolite levels and a reduced  
740 protein burden. Strains mbis3<sup>a</sup> and 10kADS<sup>b</sup> in Fig. S3 illustrate this point.

741         The role of feedback inhibition is critical to the operation of the amorphadiene  
742 network. It is essential for the implementation of the integral control that matches input  
743 flux to the output flux that is determined by the saturation of ADS. Elimination of this  
744 feedback inhibition can cause one of three behaviors, depending on the uncontrolled  
745 rate of the mutated MK: a) If the uncontrolled rate of MK is greater than that of ADS,  
746 there will be a continual increase of material within the pathway (a pathological  
747 phenotype characterized by a blowup), b) if the uncontrolled rate of MK is less than that  
748 of ADS, there will be a continual decrease of material within the pathway (a  
749 “blowdown”). However, in this case ADS will eventually become unsaturated, and the  
750 pathway will come to a new steady state and c) if the uncontrolled rate of MK is equal to  
751 that of ADS, as described in the previous section and Supplementary Section 5, there  
752 will be a steady state that is marginally stable and any transient reduction of metabolites  
753 from the pathway will lead to another marginally stable steady state with less material  
754 being held within the system. There is no unique steady state solution but rather a  
755 marginally stable manifold of solutions. The detailed analysis of a simplified system that  
756 clearly exhibits this tripartite behavior can be found in the appendix of Savageau (1969).

757         The phenotype-centric modeling strategy enables a computationally efficient  
758 exploration of the System Design Space at two different levels of detail. The first one is  
759 conducted at a global scale, involves the enumeration of the system’s phenotypic  
760 repertoire (Section 4.1) and the semi-quantitative characterization of phenotypic  
761 properties, such as robustness, dynamic behavior, and logarithmic gains (Section 4.2).

762 This step is automatically performed by the Design Space Toolbox v.3.0 (Valderrama-  
763 Gómez et al., 2020) and does not require *a priori* knowledge of kinetic parameters. In  
764 contrast, the second level involves specific numerical values for the system's  
765 parameters and is relevant when identifying a robust operating point within a  
766 biochemical phenotype of interest (Valderrama-Gómez et al., 2020), maximizing the  
767 region of validity for a specific phenotypic trait (Section 4.3), or identifying efficient  
768 transitions in parameter space between biochemical phenotypes (Section 4.4). At this  
769 level of detail, ensemble modeling approaches addressing parametric uncertainties by  
770 dense sampling (Tran et al., 2008; Lee et al., 2014) could benefit from the ability of the  
771 phenotype-centric modeling strategy to identify physiological phenotypes. This synergy  
772 would dramatically speedup model parameterization by restricting parameter sampling  
773 to regions in Design Space leading to stable, physiological models. Further,  
774 conventional optimization methods, such as gradient descent (Ruder, 2017), Newton's  
775 method (Polyak, 2007), and evolutionary algorithms (Bäck and Schwefel, 1993), among  
776 others, could also benefit from an efficient identification of regions of interest in Design  
777 Space exhibiting desired properties.

778         Regardless of the level in which the Design Space is explored, numerical  
779 simulation of the underlying system of differential equations (e.g., Figs. 2B-D, 4B, 4D  
780 and 5B) is not required in the context of the phenotype-centric modeling strategy and is  
781 only performed in this work to confirm our predictions. Overall, we observed a high  
782 accuracy in our predictions, as evidenced by (a) logarithmic gains estimated for  
783 biochemical phenotypes **7306\_3** (Fig. 4B and D) and **6153** (Fig. 5B) closely matching  
784 the slopes of the respective titration curves, and (b) successful prediction of the full

785 system's dynamics using an eigenvalue analysis of relevant biochemical phenotypes  
786 (Fig. 2 and Table S3). Note that deviations in our predictions from the actual behavior of  
787 the full system are a natural consequence of the mathematical definition of biochemical  
788 phenotypes. Deviations are expected to be low about a phenotype's centroid and higher  
789 at phenotypic boundaries, where, by definition, there is no dominance (Savageau and  
790 Lomnitz, 2014).

791       Even though the mechanistic model analyzed here only considered enzyme-  
792 catalyzed metabolic processes, the mathematical formalism behind the phenotype-  
793 centric approach is general and can handle models covering protein and mRNA  
794 synthesis with multiple regulatory layers at the transcription, translation and post-  
795 translation levels. The only formal requirement is that the mechanisms are described by  
796 fundamental chemical and biochemical kinetics, which can be recast into the GMA form  
797 as exemplified in the Supplementary Section 2. One additional aspect to consider when  
798 building and analyzing kinetic models for Metabolic Engineering applications is the  
799 effect of enzyme overexpression on proteome allocation. This effect will become  
800 particularly important when one enzyme makes up a significant percentage of the  
801 overall proteome due to enzyme overexpression. Note that the effect of ADS  
802 overexpression on pathway enzyme levels was not considered in the titration studies  
803 shown in Figs. 4B and 4D. However, this can be done by constraining the total  
804 concentration of pathway enzymes (or in general, the total proteome) to a given value.  
805 We recently expanded the Design Space Toolbox (Valderrama-Gómez et al., 2020) to  
806 handle the system of algebraic differential equations resulting from such considerations

807 and we expect to explore the effect of proteome allocation constraints for kinetic models  
808 in a future work.

809         We believe that the phenotype-centric strategy has the potential to advance the  
810 field of rational Metabolic Engineering by (a) providing an efficient way to explore the  
811 Design Space at different levels of detail, (b) allowing the evaluation of model  
812 hypothesis in a structured manner, (c) enabling metabolic network optimization based  
813 on kinetic models without requiring *a priori* knowledge of parameter values, and (d)  
814 serving as a scaffold for the development of kinetics-based algorithms for rational  
815 Metabolic Engineering. Using the amorphadiene biosynthetic network as a case study,  
816 we demonstrated each one of these advantages and provided a mechanistic context for  
817 the experimental work of Weaver et al. (2015). We envision next generation  
818 development of strain-design algorithms and methods for rational pathway optimization  
819 to exploit the predictive power of mechanistic models by leveraging a modeling  
820 paradigm that is more focused on biochemical phenotypes and their transitions and  
821 relies less on first requiring specific parameter values and numerical simulation.

822

## 823 **6. Acknowledgements**

824         This work was supported in part by a grant from the US National Science  
825         Foundation Grant number MCB 1716833.

826

827

828

829

## 830 7. Author contributions

831 Conceptualization, M.A.V.; Methodology, M.A.V. and M.A.S.; Software, M.A.V;  
832 Validation, M.A.V.; Investigation, M.A.V. and M.A.S.; Writing, M.A.V. and M.A.S;  
833 Funding Acquisition, M.A.S.

834

## 835 8. Declaration of Interests

836 The authors declare no conflict of interests

837

838

## 839 9. References

840

- 841 • Aström, K. J., and Murray, R. M. (2010) Feedback Systems: an Introduction for  
842 Scientists and Engineers (Princeton Univ. Press, 2010).
- 843 • Bailey, J.E. (1991). Toward a science of metabolic engineering. *Science*. 252, 1668-  
844 1675.
- 845 • Bäck, T., Schwefel, H.P. (1993). An Overview of evolutionary algorithms for  
846 parameter optimization. *Evol. Comput.* 1, 1–23.
- 847 • Chowdhury, A., Khodayari, A., and Maranas, C.D. (2015). Improving prediction  
848 fidelity of cellular metabolism with kinetic descriptions. *Curr. Opin. Biotechnol.* 36, 57–  
849 64.
- 850 • Chubukov, V., Mukhopadhyay, A., Petzold, C.J., Keasling, J.D., and Martín, H.G.  
851 (2016). Synthetic and systems biology for microbial production of commodity  
852 chemicals. *Npj Syst. Biol.* 2, 16009.
- 853 • Fasani, R.A., and Savageau, M.A. (2010). Automated construction and analysis of the  
854 design space for biochemical systems. *Bioinformatics* 26, 2601–2609.
- 855 • Harder, B.J., Bettenbrock, K., Klamt, S. (2016). Model-based metabolic engineering  
856 enables high yield itaconic acid production by *Escherichia coli*. *Metab. Eng.* 38, 28–37.
- 857 • Lee, J.W., Na, D., Park, J.M., Lee, J., Choi, S., and Lee S.Y. (2012). Systems  
858 metabolic engineering of microorganisms for natural and non-natural chemicals. *Nat.*  
859 *Chem. Biol.* 8, 536–546.
- 860 • Lee, S.J., Lee, D.Y., Kim, T.Y., Kim, B.H., Lee, J., and Lee S.Y. (2005). Metabolic  
861 engineering of *Escherichia coli* for enhanced production of succinic acid, based on  
862 genome comparison and in silico gene knockout simulation. *Appl Environ Microbiol.*  
863 *71*, 7880–7887.
- 864 • Lee, Y., Lafontaine-Rivera, J.G., and Liao, J.C. (2014). Ensemble modeling for  
865 robustness analysis in engineering non-native metabolic pathways. *Metab. Eng.* 25,  
866 63–71.

- 867 • Link, H., Christodoulou, D., and Sauer, U. (2014). Advancing metabolic models with  
868 kinetic information. *Curr. Opin. Biotechnol.* 29, 8–14.
- 869 • Lomnitz, J.G., and Savageau, M.A. (2016). Design Space Toolbox V2: Automated  
870 software enabling a novel phenotype-centric modeling strategy for natural and  
871 synthetic biological systems. *Front. Genet.* 7, 118.
- 872 • Miziorko, H.M. (2011). Enzymes of the mevalonate pathway of isoprenoids  
873 biosynthesis. *Arch. Biochem. Biophys.* 505, 131–143.
- 874 • Nakamura, C.E., and Whited, G.M. (2003). Metabolic engineering for the microbial  
875 production of 1,3-propanediol. *Curr. Opin. Biotechnol.* 14, 454–459.
- 876 • Newman, J.D., Marshall, J., Chang, M., Nowroozi, F., Paradise, E., Pitera, D.,  
877 Newman, K.L., and Keasling, J.D. (2006). High-level production of amorpha-4,11-  
878 diene in a two-phase partitioning bioreactor of metabolically engineered *Escherichia*  
879 *coli*. *Biotechnol. Bioeng.* 95, 684–691.
- 880 • Paddon, C.J., Westfall, P.J., Pitera, D.J., et al. (2013). High-level semi-synthetic  
881 production of the potent antimalarial artemisinin. *Nature*, 496, 528–532.
- 882 • Polyak, B.T. (2007). Newton’s method and its use in optimization. *Eur. J. Oper. Res.*  
883 181, 1086–1096.
- 884 • Ruder, S. (2017). An overview of gradient descent optimization algorithms.  
885 arXiv:1609.04747.
- 886 • Savageau, M.A. (1969). Biochemical systems analysis: II. The steady-state solutions  
887 for an n-pool system using a power-law approximation. *J. Theor. Biol.* 25, 370–379.
- 888 • Savageau, M.A. (1971). Concepts relating the behavior of biochemical systems to their  
889 underlying molecular properties. *Arch. Biochem. Biophys.* 145, 612–621.
- 890 • Savageau, M.A. and Voit, E.O. (1987). Recasting Nonlinear Differential Equations as  
891 S-systems: A canonical Nonlinear Form. *Math. Biosci.* 87, 83–115.
- 892 • Savageau, M.A., Coelho, P.M.B.M., Fasani, R.A., Tolla, D.A., and Salvador, A. (2009).  
893 Phenotypes and tolerances in the design space of biochemical systems. *Proc. Natl.*  
894 *Acad. Sci. U.S.A.* 106, 6435–6440.
- 895 • Savageau, M.A. 2009. *Biochemical Systems Analysis: A Study of Function and Design*  
896 *in Molecular Biology, 40th Anniversary Edition [A reprinting of the original edition by*  
897 *Addison-Wesley, Reading, Mass (1976)]*.
- 898 • Savageau, M.A., and Lomnitz, J.G. (2014). Deconstructing complex nonlinear models  
899 in system design space. In: Jonoska N., Saito M. (eds) *Discrete and Topological*  
900 *Models in Molecular Biology. Natural Computing Series. Springer, Berlin, Heidelberg.*  
901 [https://doi.org/10.1007/978-3-642-40193-0\\_22](https://doi.org/10.1007/978-3-642-40193-0_22), 475–506.
- 902 • Schrijver, A. (1986). *Theory of Linear and Integer Programming.* Wiley-Interscience,  
903 New York, NY.
- 904 • Tran, L.M., Rizk, M.L., Liao, J.C. (2008). Ensemble Modeling of Metabolic Networks.  
905 *Biophys. J.* 95, 5606–5617.
- 906 • Valderrama-Gómez, M.Á., Kreitmayer, S., Wolf, S., Marin-Sanguino, A., and  
907 Kremling, A. (2017). Application of theoretical methods to increase succinate  
908 production in engineered strains. *Bioproc. Biosyst. Eng.* 40, 479–497.
- 909 • Valderrama-Gómez, M.Á., Parales, R.E., and Savageau, M.A. (2018). Phenotype-  
910 centric modeling for elucidation of biological design principles. *J. Theor. Biol.* 455,  
911 281–292.

- 912 • Valderrama-Gómez, M.Á., Lomnitz, J.G., Fasani, R.A., and Savageau, M.A. (2020).  
913 Mechanistic modeling of biochemical systems without a priori parameter values using  
914 the design space toolbox v.3.0. *iScience*, 23, 101200.
- 915 • Valderrama-Gómez, M.Á. and Savageau, M.A. (2021). Molecular Systems Predict  
916 Equilibrium Distributions of Phenotype Diversity Available for Selection. *bioRxiv*  
917 2021.05.27.446045; doi: <https://doi.org/10.1101/2021.05.27.446045>
- 918 • Yim. H., Haselbeck, R., Niu, W., et al. (2011). Metabolic engineering of *Escherichia*  
919 *coli* for direct production of 1,4-butanediol. *Nat. Chem. Biol.* 7, 445–452.
- 920 • Weaver, L.J., Sousa, M.M.L., Wang, G., Baidoo, E., Petyold, C.J., Keasling, J.D.  
921 (2015). A kinetic-based approach to understanding heterologous mevalonate  
922 pathway function in *E. coli*. *Biotechnol. Bioeng.* 112, 111–119.
- 923 • Wiechert, W., Noack, S. (2011). Mechanistic pathway modeling for industrial  
924 biotechnology: challenging but worthwhile. *Curr. Opin. Biotechnol.* 22, 604–610.
- 925 • Zomorodi, A.R., Suthers, P.F., Ranganathan, S., and Maranas, C.D. (2012).  
926 Mathematical optimization applications in metabolic networks. *Met. Eng.* 14, 672–  
927 686.  
928
